# Supplementary material for: Electrochemical Discrimination of Salbutamol from Its Excipients in VentolinTM at Nanoporous Gold Microdisc Arrays
Source: MDPI journal article supplement (doi:10.3390/s21123975), 2021-06-09
Supplement: s1 [file s1]

## Supplementary Materials

### Electrochemical Discrimination of Salbutamol from its Excipients in Ventolin™ at Nanoporous Gold Microdisc Arrays

Lorraine C. Nagle <sup>1\*</sup>, Amelie Wahl<sup>1</sup>, Vladimir Ogourstov<sup>1</sup>, Ian Seymour<sup>1</sup>, Fiona Barry<sup>1</sup>, James F. Rohan<sup>1</sup>  
and Ronan Mac Loughlin <sup>2</sup>

<sup>1</sup>Tyndall National Institute, Lee Maltings Complex, University College Cork, Ireland, T12R5CP

<sup>2</sup>Science and Emerging Technologies, Aerogen Ltd. Galway Business Park, Dangan, Galway, Ireland

\* Correspondence [lorraine.nagle@tyndall.ie](mailto:lorraine.nagle@tyndall.ie); Tel.: (+353-21-4904266)

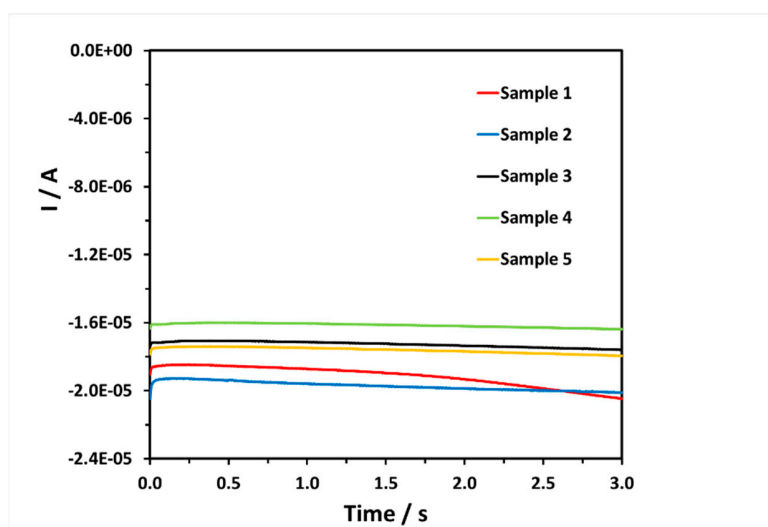

**Figure S1.** Chronoamperograms recorded at five different gold microdisc array electrodes during 3 s AuAg electrodeposition at -1.19 V vs. SCE in a solution of 100 mM KAg(CN)<sub>2</sub> and 20 mM KAu(CN)<sub>2</sub> in 250 mM Na<sub>2</sub>CO<sub>3</sub> at pH 13 at 20 °C.

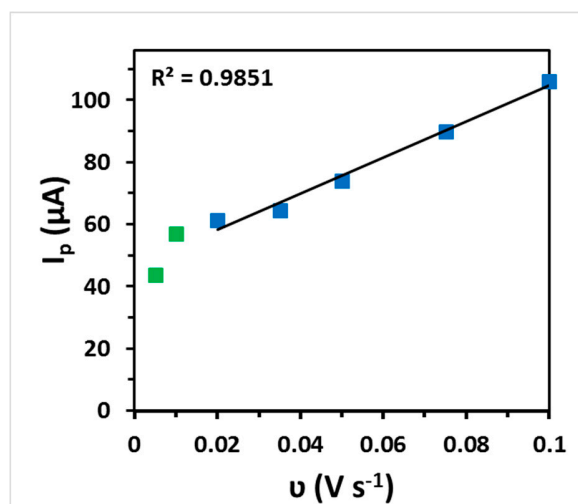

**Figure S2.** Plot of peak current versus scan rate for the peak associated with combined salbutamol oxidation and chloride adsorption in 2 mg/ml salbutamol in 0.0154 M NaCl and 0.05 mM H<sub>2</sub>SO<sub>4</sub> solution at pH 4. The peak current was taken from the LSV recorded from -0.2 to 1.0 V vs. Pt at 10 mV s<sup>-1</sup> at bare gold microdisc array electrode.

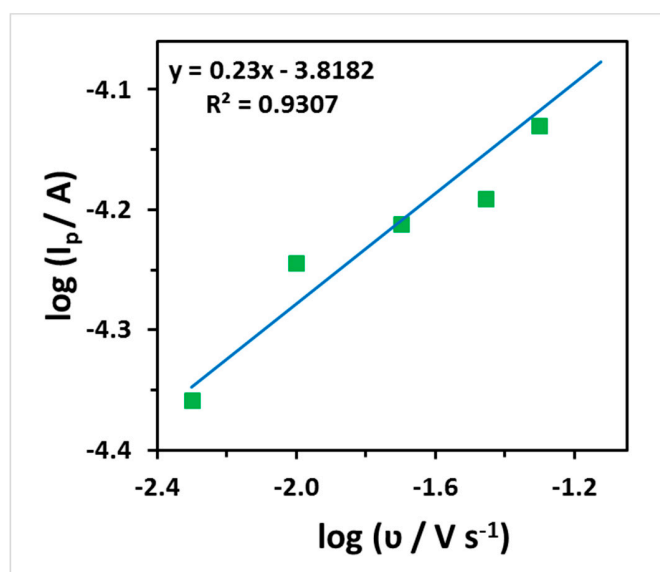

**Figure S3.** Plot of log of peak current versus log scan rate for the peak associated with combined salbutamol oxidation and chloride adsorption in 2 mg/ml salbutamol in 0.0154 M NaCl and 0.05 mM H<sub>2</sub>SO<sub>4</sub> solution at pH 4. The peak current was taken from the LSV recorded from -0.20 to 1.0 V vs. Pt at 10 mV s<sup>-1</sup> at a bare gold microdisc array electrode.

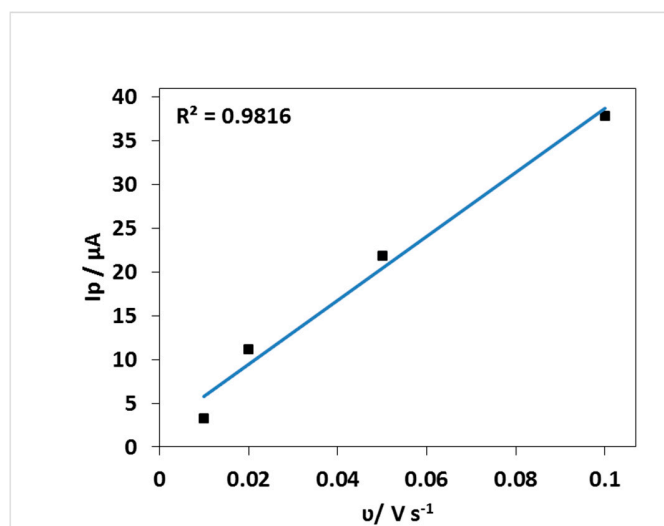

**Figure S4.** Plot of peak current versus scan rate for chloride adsorption in 2 mg/ml salbutamol in 0.0154 M NaCl and 0.05 mM H<sub>2</sub>SO<sub>4</sub> solution at pH 4 taken from the LSV recorded from -0.20 to 1.0 V vs. Pt at 10 mV s<sup>-1</sup> at NPG-modified gold microdisc array electrode.

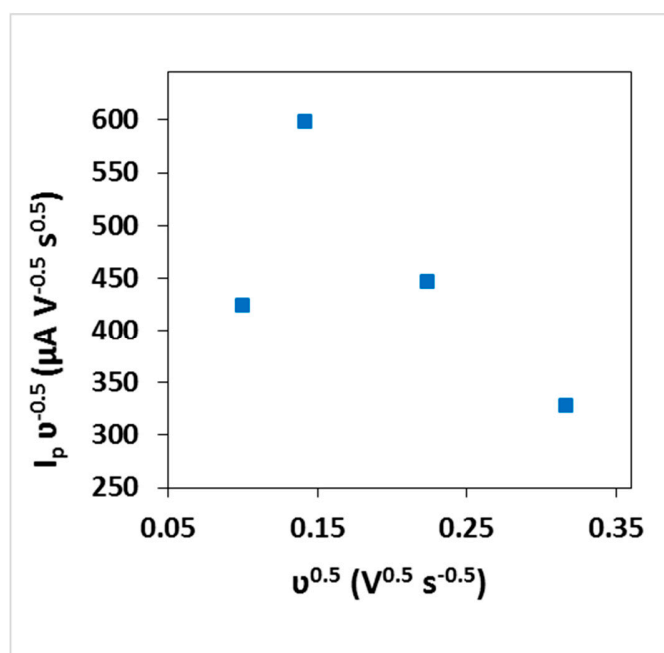

**Figure S5.** Plot of peak current function for salbutamol oxidation versus square root of scan rate recorded in 2 mg/ml salbutamol in 0.0154 M NaCl and 0.05 mM H<sub>2</sub>SO<sub>4</sub> solution at pH 4 take from the LSV recorded from -0.20 to 1.0 V vs. Pt at 10 mV s<sup>-1</sup> at NPG-modified gold microdisc array electrode.

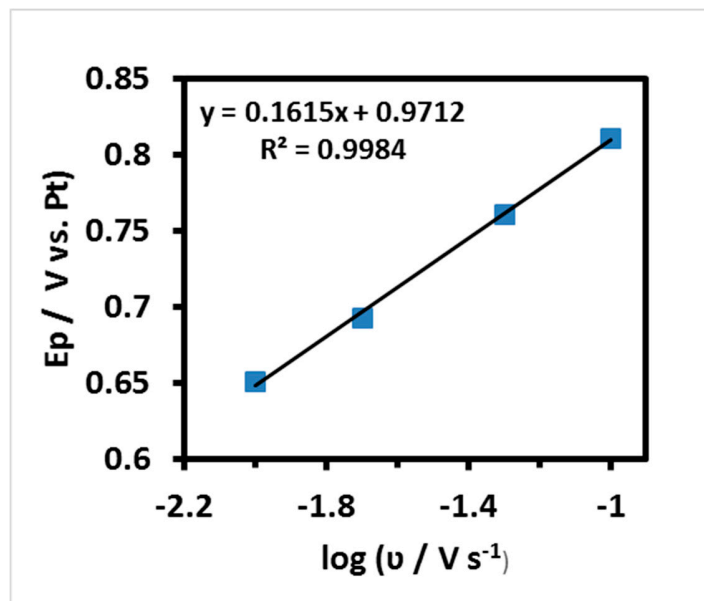

**Figure S6.** Plot of peak potential for salbutamol oxidation versus log of scan rate recorded in 2 mg/ml salbutamol in 0.0154 M NaCl and 0.05 mM H<sub>2</sub>SO<sub>4</sub> solution at pH 4 taken from the LSV recorded from -0.20 to 1.0 V vs. Pt at 10 mV s<sup>-1</sup> at NPG-modified gold microdisc array electrode.

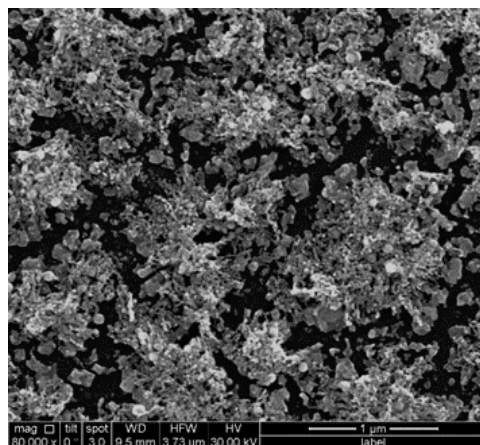

**Figure S7.** Plan view SEM image of NPG-modified microdisc array following recording of LSV from -0.20 to 1.0 V vs. Pt at 10 mV s<sup>-1</sup> in 1 mg/ml salbutamol in 0.0154 M chloride and 0.05 mM H<sub>2</sub>SO<sub>4</sub>.
